# Supplementary material for: Classification and Registration of Persistent Somatic Symptoms in Primary Care: A General Practitioner’s Perspective
Source: Research Square preprint supplement (doi:10.21203/rs.3.rs-146828/v1), 2021-02-08
Supplement: Supplementary file 1 [file 33591bf32586413f074e6a5d.docx]

**Classification and Registration of Persistent Somatic Symptoms in Primary Care: a General Practitioner’s Perspective**

Willeke M. Kitselaar, MSc.,1,2 Rosalie van der Vaart, MSc PhD,1 Madelon van Tilborg-den Boeft, MD PhD,2 Hedwig M.M. Vos, MD PhD,2 Prof. Mattijs E. Numans, MD PhD,2 Prof. Andrea W.M. Evers, MSc. PhD1

1Health, Medical and Neuropsychology Department

Leiden University Faculty of Social and Behavioral Sciences

Leiden, the Netherlands

2Public Health and Primary Care Department / LUMC-Campus Den Haag

Leiden University Medical Center

The Hague, the Netherlands

Supplementary Table 1. Overview of items, ICPC codes and categorization

|  |  | Type of complaint | | | |  |
| --- | --- | --- | --- | --- | --- | --- |
| ICPC | **Name** | **Neck & back** | **Bowel** | **Dyspnea** | **Fatigue** | **Category** |
| A01 | Pain general/multiple sites | X | X |  |  | General |
| A04 | Weakness/tiredness general |  |  | X | X | Specific |
| A04.01 | Chronic fatigue syndrome |  |  | X | X | Syndrome |
| A28 | Limited function/disability NOS | X | X | X | X | General |
| A97 | No disease | X | X | X | X | General |
| A99 | General disease NOS | X | X | X | X | General |
| D01 | Abdominal pain/cramps general |  | X |  |  | Specific |
| D02 | Abdominal pain epigastric |  | X |  |  | Specific |
| D06 | Abdominal pain localized other |  | X |  |  | Specific |
| D20 | Mouth/tongue/lip symptom/complaint |  |  | X |  | Specific |
| D28 | Limited function/disability (d) |  | X |  |  | General |
| D29 | Digestive symptom/complaint other |  | X |  |  | General |
| D93 | Irritable bowel syndrome |  | X |  |  | Syndrome |
| K02 | Pressure/tightness of heart |  |  | X |  | Specific |
| K03 | Cardiovascular pain NOS |  |  | X |  | General |
| K04 | Palpitations/awareness of heart |  |  | X |  | Specific |
| K05 | Irregular heartbeat other |  |  | X |  | Specific |
| L01 | Neck symptom/complaint | X |  |  |  | Specific |
| L02 | Back symptom/complaint | X |  |  |  | Specific |
| L03 | Low back symptom/complaint | X |  |  |  | Specific |
| L18 | Muscle pain | X |  |  |  | Specific |
| L18.01 | Fibromyalgia | X |  |  |  | Syndrome |
| L27 | Fear musculoskeletal disease other | X |  |  |  | General |
| L28 | Limited function/disability (l) | X |  |  |  | General |
| L29 | Sympt./complaint musculoskeletal other | X |  |  |  | General |
| L79 | Sprain/strain of joint NOS | X |  |  |  | Specific |
| L79.01 | Whiplash trauma cervical spine | X |  |  |  | Specific |
| L83 | Neck syndrome | X |  |  |  | Specific |
| L86 | Back syndrome with radiating pain | X |  |  |  | Specific |
| L86.01 | Spinal disc herniation (thoracic/lumbar) | X |  |  |  | Specific |
| N01 | Headache | X |  |  |  | Specific |
| N28 | Limited function/disability (n) | X | X |  |  | General |
| N29 | Neurological symptom/complaint other | X | X | X |  | General |
| P28 | Limited function/disability (p) | X | X | X | X | General |
| P29 | Psychological symptom/complaint other | X | X | X | X | General |
| P75 | Somatization disorder | X | X | X | X | Somatization |
| P99 | Psychological disorders, other | X | X | X | X | General |
| R01 | Pain respiratory system |  |  | X |  | Specific |
| R02 | Shortness of breath/dyspnoea |  |  | X |  | Specific |
| R04 | Breathing problem, other |  |  | X |  | General |
| R28 | Limited function/disability (r) |  |  | x |  | General |
| U13 | Bladder symptom/complaint other |  | X |  |  | General |
| U28 | Limited function/disability urinary |  | X |  |  | General |
